# Supplementary material for: An Easy and Sensitive Method to Profile the Antibody Specificities of HLA–specific Memory B Cells
Source: PubMed Central journal article supplement (PMC6430593; doi:10.1097/tp.0000000000002516), 2019-03-22
Supplement: tp-103-716-s001.pdf [file tp-103-716-s001.pdf]

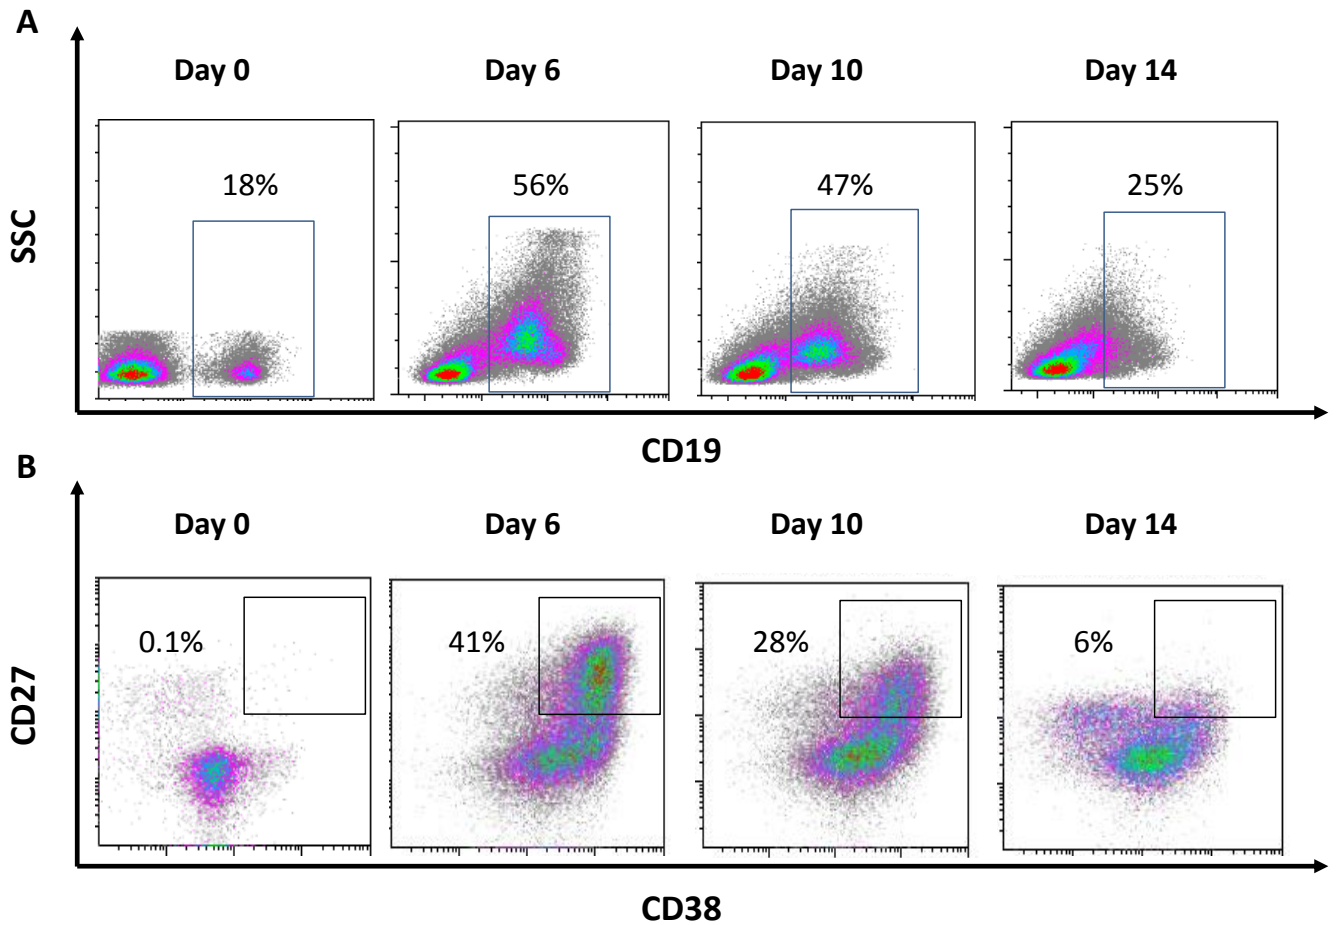

**Figure S1: Representative flow cytometry plots before and after polyclonal B cell stimulation. A)** Percentage of CD19<sup>+</sup> B cells within the live lymphocyte gate and **B)** Percentage of CD19<sup>+</sup>CD27<sup>+</sup>CD38<sup>high</sup> cells increase significantly from day 0 to day 6 of polyclonal activation, followed by a decrease at day 10 and day 14. (n=9 [re-tx n=3, multiparous n=1 and alloantigen non-exposed, n=5]). re-tx: repeat transplantation.

**A**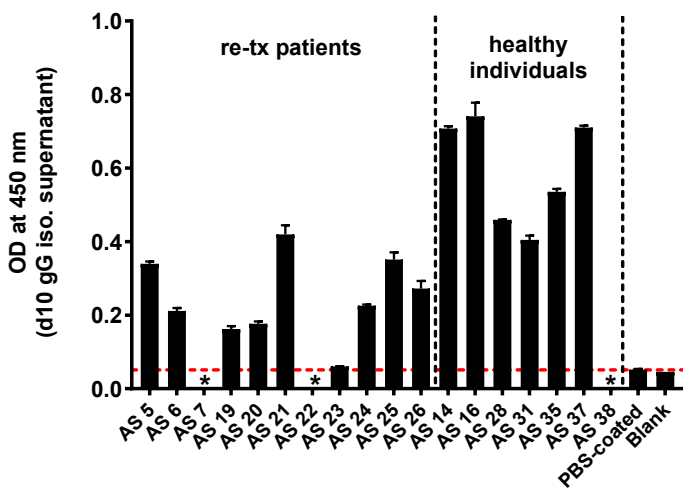**B**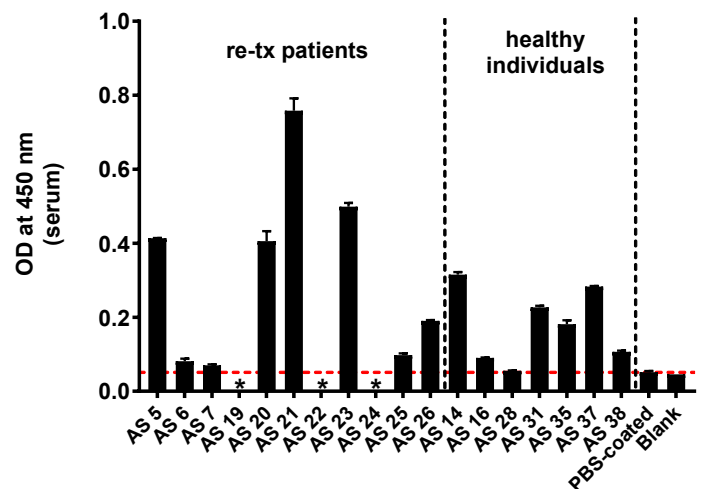

**Figure S2: Tetanus toxoid-specific response in (A) d10 IgG isolated culture supernatants and (B) serum samples.** To measure the TT-specific IgG responses, ELISA plates were coated with 10 Lf/ml TT antigen diluted in PBS (Dutch Vaccine Institute, Bilthoven, the Netherlands), incubated overnight and were blocked with 2% bovine serum albumin (BSA) in 0.025% Tween-20 in phosphate-buffered saline (PBS-T). Fifty  $\mu$ l of d10 IgG isolated supernatants (1:250 diluted) or serum samples (1:1000 diluted) were incubated for 1h at 37°C. After washing with PBS-T, biotinylated goat anti-human IgG (Novex Life Technologies) was added for 1h at 37°C. Following washing, plates were incubated with streptavidin conjugated to horse radish peroxidase (Thermo-Scientific) for 1h at 37°C. A color reaction was obtained by addition of 4.6 mM 2,2'-azine-bis(3-ethylbenzthiazoline-6-sulphonic acid) (ABTS, Sigma) in a citric acid/PBS buffer at pH 4.2 upon extensive washing. Color reaction was stopped by addition of 250 mM oxalic acid. Optic density (OD) values were obtained by measuring plates at 450 nm. Wells coated only with PBS and wells coated with TT antigen but lacking incubation with the sample (blank) were regarded as negative controls. Results are expressed as mean OD values  $\pm$  SD of duplicate wells. \*Not tested due to insufficient sample material.

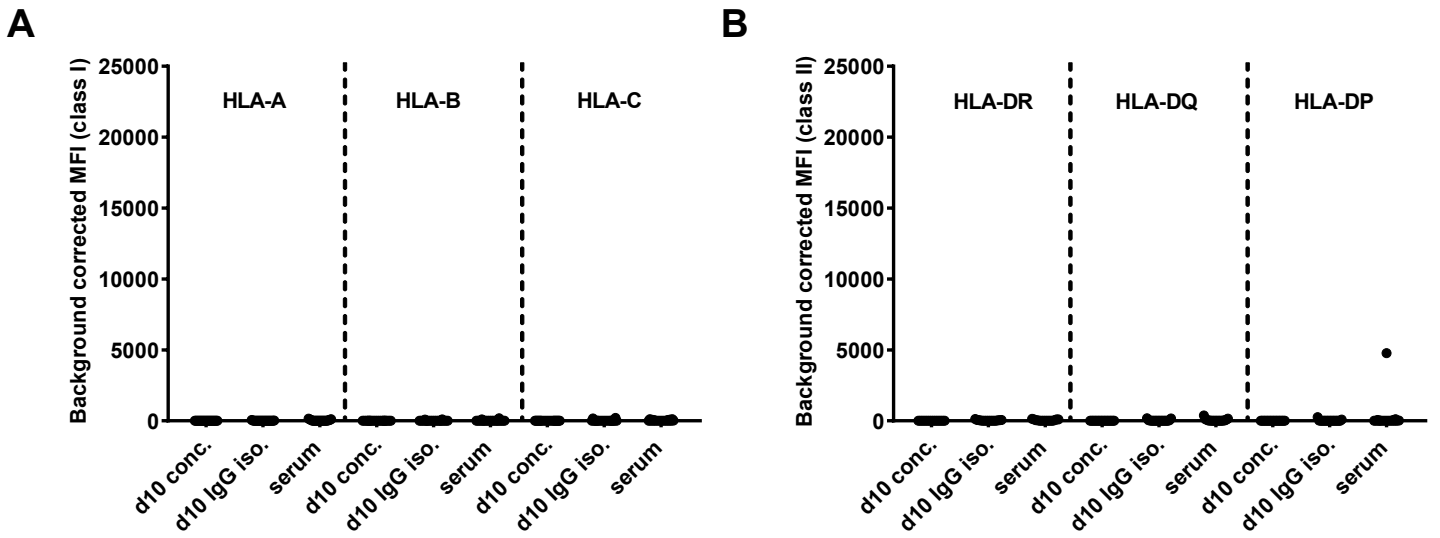

**Figure S3: MFI values of self-HLA coated beads. A)** Background corrected MFI values of self HLA class I and **B)** HLA class II-coated beads measured in d10 concentrated, d10 IgG isolated supernatants and paired serum samples (n=11 [re-tx n=9 and multi-parous n=2]). MFI: Mean fluorescence intensity, re-tx: repeat transplantation, d10 conc.: day 10 concentrated, d10 IgG iso.: day 10 IgG isolated.



**Table S1: Immunological overview of alloantigen exposed individuals of the study cohort**

|                                            |                                                                                                                                                                                                                                                                                                                                                                                                                                                |
|--------------------------------------------|------------------------------------------------------------------------------------------------------------------------------------------------------------------------------------------------------------------------------------------------------------------------------------------------------------------------------------------------------------------------------------------------------------------------------------------------|
| <b>Study code</b>                          | AS 5                                                                                                                                                                                                                                                                                                                                                                                                                                           |
| <b>Sex</b>                                 | F                                                                                                                                                                                                                                                                                                                                                                                                                                              |
| <b>Study group</b>                         | re-tx                                                                                                                                                                                                                                                                                                                                                                                                                                          |
| <b>Time (months)*</b>                      | 53                                                                                                                                                                                                                                                                                                                                                                                                                                             |
| <b>Self HLA class I</b>                    | A*02:01:01, A*03:01:01:01, B*07:02:01, B*40:01:02, C*03:04:01:01, C*07:02:01:03                                                                                                                                                                                                                                                                                                                                                                |
| <b>Self HLA class II</b>                   | DRB1*04:07:01, DRB1*13:02:01, DRB3*03:01:01, DRB4*01:03:01:01, DQB1*03:01:01:01, DQB1*06:04:01, DQA1*01:02:01, DQA1*03, DPB1*03:01:01, DPA1*01:03:01:03, DPA1*01:03:01:03                                                                                                                                                                                                                                                                      |
| <b>Donor (D)/Partner (P)/Child (C) HLA</b> | <b>D:</b> A2, A3, B7, <b>B44</b> , <b>Cw2</b> , Cw7, DR4, DR13, DQ6, DQ7                                                                                                                                                                                                                                                                                                                                                                       |
| <b>Serum positive class I SABs</b>         | A*23:01, A*24:02, A*24:03, B*13:02, B*14:01, B*14:02, B*15:01, B*15:02, B*15:03, B*15:12, B*15:13, B*15:16, B*15:18, B*18:01, B*27:03, B*27:05, B*27:08, B*35:01, B*35:08, B*37:01, B*38:01, B*39:01, B*44:02, B*44:03, B*45:01, B*46:01, B*47:01, B*49:01, B*50:01, B*51:01, B*52:01, B*53:01, B*54:01, B*55:01, B*56:01, B*57:01, B*58:01, B*59:01, B*67:01, B*78:01, B*82:02, C*02:02, C*04:03, C*05:01, C*06:02, C*15:02, C*17:01, C*18:01 |
| <b>Supernatant positive class I SABs</b>   | <b>A*01:01</b> , A*23:01, A*24:02, B*15:12, B*44:02, B*44:03, B*45:01, B*46:01, B*82:02                                                                                                                                                                                                                                                                                                                                                        |
| <b>Serum positive class II SABs</b>        | DPA1*01:03-DPB1*02:01, DPA1*01:03-DPB1*04:01, DPA1*02:01-DPB1*04:01, DPA1*02:02-DPB1*04:01, DPA1*03:01-DPB1*04:01, DPA1*04:01-DPB1*04:01, DPA1*01:03-DPB1*04:02, DPA1*03:01-DPB1*04:02, DPA1*02:01-DPB1*15:01, DPA1*01:03-DPB1*18:01, DPA1*02:02-DPB1*28:01                                                                                                                                                                                    |
| <b>Supernatant positive class II SABs</b>  | <b>DRB1*11:01, DRB1*11:03, DRB1*11:04</b> , DPA1*01:03-DPB1*02:01, DPA1*01:03-DPB1*04:02, DPA1*03:01-DPB1*04:02, DPA1*01:03-DPB1*18:01, DPA1*02:02-DPB1*28:01                                                                                                                                                                                                                                                                                  |

Specificities marked with red were found only in supernatants in the absence of serum specificities.

HLA mismatches are marked with bold letters within the available resolution of the HLA typing.

\*Time from the last graft failure/delivery to the sampling date.

SABs: Single antigen beads, re-tx: repeat transplantation.

Table S1 continued

|                                            |                                                                                                                                                                                                                                                                                                                                                                                                                                            |
|--------------------------------------------|--------------------------------------------------------------------------------------------------------------------------------------------------------------------------------------------------------------------------------------------------------------------------------------------------------------------------------------------------------------------------------------------------------------------------------------------|
| <b>Study code</b>                          | AS 6                                                                                                                                                                                                                                                                                                                                                                                                                                       |
| <b>Sex</b>                                 | M                                                                                                                                                                                                                                                                                                                                                                                                                                          |
| <b>Study group</b>                         | re-tx                                                                                                                                                                                                                                                                                                                                                                                                                                      |
| <b>Time (months)*</b>                      | 2                                                                                                                                                                                                                                                                                                                                                                                                                                          |
| <b>Self HLA class I</b>                    | A*02:01:01, A*32:01:01:01, B*07:02:01, B*40:01:02, C*03:04:01:01, C*07:02:01:03                                                                                                                                                                                                                                                                                                                                                            |
| <b>Self HLA class II</b>                   | DRB1*13:02:01, DRB1*15:01:01, DRB3*03:01:01, DRB5*01, DQB1*06:02:01:01, DQB1*06:04:01, DQA1*01:02:01, DPB1*02:01:02, DPB1*04:02:01:02, DPA1*01:03:01, DPA1*01:03:01:01                                                                                                                                                                                                                                                                     |
| <b>Donor (D)/Partner (P)/Child (C) HLA</b> | <b>D1:</b> A*02:01, <b>A*31:01</b> , B*07:02, B*40:01, C*03:04, C*07:02, <b>DRB1*13:02</b> , DRB1*15, DQB1*06:02, DQB1*06:04<br><b>D2:</b> A*02:01, A*02:01, <b>B*13:02</b> , B*40:01, C*03:04, <b>C*06:02, DRB1*04:01, DRB1*08:01, DQB1*03:01, DQB1*04:02</b>                                                                                                                                                                             |
| <b>Serum positive class I SABs</b>         | A*29:01, A*29:02, A33:01                                                                                                                                                                                                                                                                                                                                                                                                                   |
| <b>Supernatant positive class I SABs</b>   | negative                                                                                                                                                                                                                                                                                                                                                                                                                                   |
| <b>Serum positive class II SABs</b>        | DRB1*04:01, DRB1*04:02, DRB1*04:03, DRB1*04:04, DRB1*04:05, DQA1*03:01-DQB1*03:01, DQA1*03:02-DQB1*03:01, DQA1*05:01-DQB1*03:01, DQA1*06:01-DQB1*03:01, DQA1*02:01-DQB1*03:02, DQA1*03:01-DQB1*03:02, DQA1*03:02-DQB1*03:02, DQA1*03:02-DQB1*03:03, DQA1*04:01-DQB1*03:03, DQA1*06:01-DQB1*03:03, DQA1*02:01-DQB1*04:01, DQA1*04:01-DQB1*04:01, DQA1*05:01-DQB1*04:01, DQA1*03:01-DQB1*04:02, DQA1*04:01-DQB1*04:02, DQA1*06:01-DQB1*04:02 |
| <b>Supernatant positive class II SABs</b>  | negative                                                                                                                                                                                                                                                                                                                                                                                                                                   |

Table S1 continued

|                                             |                                                                                                                                                                                                                                                                                                                                                                                                                                                                                                                                                                                                                                                                               |
|---------------------------------------------|-------------------------------------------------------------------------------------------------------------------------------------------------------------------------------------------------------------------------------------------------------------------------------------------------------------------------------------------------------------------------------------------------------------------------------------------------------------------------------------------------------------------------------------------------------------------------------------------------------------------------------------------------------------------------------|
| <b>Study code</b>                           | AS 7                                                                                                                                                                                                                                                                                                                                                                                                                                                                                                                                                                                                                                                                          |
| <b>Sex</b>                                  | F                                                                                                                                                                                                                                                                                                                                                                                                                                                                                                                                                                                                                                                                             |
| <b>Study group</b>                          | re-tx                                                                                                                                                                                                                                                                                                                                                                                                                                                                                                                                                                                                                                                                         |
| <b>Time (months)*</b>                       | 27                                                                                                                                                                                                                                                                                                                                                                                                                                                                                                                                                                                                                                                                            |
| <b>Self HLA class I</b>                     | A*01:01:01:01, A*03:01:01:01, B*08:01:01:01, B*15:01:01:03, C*03:04:01:01, C*07:01:01:01                                                                                                                                                                                                                                                                                                                                                                                                                                                                                                                                                                                      |
| <b>Self HLA class II</b>                    | DRB1*04:08:01, DRB1*13:01:01, DRB3*02:02:01:02, DRB4*01:03:01:01, DQB1*03:04:01, DQB1*06:03:01, DQA1*01:03:01, DQA1*03:03:01:01, DPB1*04:01:01, DPB1*15:01:01, DPA1*01:03:01:02, DPA1*01:04                                                                                                                                                                                                                                                                                                                                                                                                                                                                                   |
| <b>Donor (D)/Partner (P) /Child (C) HLA</b> | <b>D:</b> A*01:01, <b>A*68:01</b> , B*08:01, <b>B*18:01</b> , C*07:01, <b>DRB1*04:03</b> , DRB1*13:01, <b>DQB1*03:02</b> , DQB1*06:03<br><b>P:</b> A*26:01, <b>A*68:01</b> , <b>B*44:02</b> , <b>B*55:01</b> , <b>C*03:03</b> , <b>C*07:04</b> , DRB1*13:01, <b>DRB1*14:54</b> , DQB1*05:03<br><b>DQB1*06:04</b>                                                                                                                                                                                                                                                                                                                                                              |
| <b>Serum positive class I SABs</b>          | A*02:01, A*02:02, A*02:03, A*02:05, A*11:01, A*11:02, A*23:01, A*24:02, A*24:03, A*25:01, A*26:01, A*33:01, A*33:03, A*34:02, A*43:01, A*66:01, A*66:02, A*68:01, A*68:02, A*69:01, B*07:02, B*15:16, B*27:03, B*27:05, B*27:08, B*42:01, B*54:01, B*55:01, B*56:01, B*57:01, B*58:01, B*59:01, B*67:01, B*73:01, B*81:01, B*82:02                                                                                                                                                                                                                                                                                                                                            |
| <b>Supernatant positive class I SABs</b>    | A*02:01, A*02:02, A*02:03, A*02:05, A*11:01, A*11:02, A*24:02, A*24:03, A*25:01, A*26:01, <b>A*29:01</b> , <b>A*29:02</b> , <b>A*32:01</b> , A*33:01, A*33:03, A*34:02, <b>A*36:01</b> , A*43:01, A*66:01, A*66:02, A*68:01, A*68:02, A*69:01, <b>A*74:01</b> , B*07:02, <b>B*07:03</b> , <b>B*15:13</b> , B*15:16, B*27:03, B*27:05, B*27:08, <b>B*35:01</b> , <b>B*35:08</b> , <b>B*37:01</b> , <b>B*38:01</b> , <b>B*39:01</b> , <b>B*41:01</b> , B*42:01, <b>B*44:02</b> , <b>B*44:03</b> , <b>B*47:01</b> , <b>B*49:01</b> , <b>B*51:01</b> , <b>B*52:01</b> , <b>B*53:01</b> , B*54:01, B*55:01, B*56:01, B*57:01, B*58:01, B*59:01, B*67:01, B*73:01, B*81:01, B*82:02 |
| <b>Serum positive class II SABs</b>         | negative                                                                                                                                                                                                                                                                                                                                                                                                                                                                                                                                                                                                                                                                      |
| <b>Supernatant positive class II SABs</b>   | negative                                                                                                                                                                                                                                                                                                                                                                                                                                                                                                                                                                                                                                                                      |

Table S1 continued

|                                            |                                                                                                                                                                                                                                                                                                |
|--------------------------------------------|------------------------------------------------------------------------------------------------------------------------------------------------------------------------------------------------------------------------------------------------------------------------------------------------|
| <b>Study code</b>                          | AS 14                                                                                                                                                                                                                                                                                          |
| <b>Sex</b>                                 | F                                                                                                                                                                                                                                                                                              |
| <b>Study group</b>                         | multi-parous                                                                                                                                                                                                                                                                                   |
| <b>Time (months)*</b>                      | 108                                                                                                                                                                                                                                                                                            |
| <b>Self HLA class I</b>                    | A*02:01:01, A*24:02:01:01, B*07:02:01, C*07:02:01:03                                                                                                                                                                                                                                           |
| <b>Self HLA class II</b>                   | DRB1*04:04:01, DRB1*15:01:01, DRB4*01:03:01:01, DRB5*01:01:01, DQB1*03:02:01, DQB1*06:02:01:01, DQA1*01:02:01, DQA1*03:01:01, DPB1*04:01:01, DPA1*01:03:01:04                                                                                                                                  |
| <b>Donor (D)/Partner (P)/Child (C) HLA</b> | <b>C:</b> A*02:01, A*24, B*07, <b>B*40:01</b> , C*03:04, C*07:02, DRB1*04:04, DRB1*15:01, DRB4, DRB5, DQB1*03:02, DQB1*06:02                                                                                                                                                                   |
| <b>Serum positive class I SABs</b>         | B*13:02, B*14:01, B*15:01, B*15:02, B*15:03, B*15:12, B*15:13, B*15:18, B*18:01, B*35:01, B*35:08, B*37:01, B*38:01, B*39:01, B*40:01, B*40:02, B*41:01, B*44:02, B*44:03, B*45:01, B*47:01, B*48:01, B*49:01, B*50:01, B*51:01, B*52:01, B*53:01, B*54:01, B*55:01, B*56:01, B*59:01, B*78:01 |
| <b>Supernatant positive class I SABs</b>   | B*13:02, B*15:01, B*15:12, <b>B*27:05, B*27:08</b> , B*40:01, B*40:02, B*41:01, B*44:02, B*44:03, B*45:01, B*47:01, B*49:01, B*50:01                                                                                                                                                           |
| <b>Serum positive class II SABs</b>        | negative                                                                                                                                                                                                                                                                                       |
| <b>Supernatant positive class II SABs</b>  | negative                                                                                                                                                                                                                                                                                       |



Table S1 continued

|                                            |                                                                                                                                                                            |
|--------------------------------------------|----------------------------------------------------------------------------------------------------------------------------------------------------------------------------|
| <b>Study code</b>                          | AS 16                                                                                                                                                                      |
| <b>Sex</b>                                 | F                                                                                                                                                                          |
| <b>Study group</b>                         | multi-parous                                                                                                                                                               |
| <b>Time (months)*</b>                      | 346                                                                                                                                                                        |
| <b>Self HLA class I</b>                    | A*11:01:01:01, A*25:01:01, B*15:01:01:01, B*18:01:01, C*03:03:01:01, C*12:03:01:01                                                                                         |
| <b>Self HLA class II</b>                   | DRB1*08:01/08*77, DRB1*13:01:01, DRB3*02:02:01:02, DQB1*04:02:01, DQB1*06:03:01, DQA1*01:03/01:10/01:14, DQA1*04:01/04:02/04:03N, DPB1*02:01, DPB1*04:01:01, DPA1*01:03:01 |
| <b>Donor (D)/Partner (P)/Child (C) HLA</b> | <b>P: A*02, A*02, B*39, B*40</b> , C*03, C*07, DRB1*08, DRB1*13, DRB3, DQB1*04, DQB1*06, <b>DQA1*01:02</b> , DQA1*04:01                                                    |
| <b>Serum positive class I SABs</b>         | negative                                                                                                                                                                   |
| <b>Supernatant positive class I SABs</b>   | negative                                                                                                                                                                   |
| <b>Serum positive class II SABs</b>        | DQA1*03:01-DQB1*03:02, DQA1*03:02-DQB1*03:02                                                                                                                               |
| <b>Supernatant positive class II SABs</b>  | <b>DQA1*03:01-DQB1*03:01</b> , DQA1*03:01-DQB1*03:02, DQA1*03:02-DQB1*03:02, <b>DQA1*03:02-DQB1*03:03</b>                                                                  |

Table S1 continued

|                                            |                                                                                                                                                                                                                                                                                                                                                                                |
|--------------------------------------------|--------------------------------------------------------------------------------------------------------------------------------------------------------------------------------------------------------------------------------------------------------------------------------------------------------------------------------------------------------------------------------|
| <b>Study code</b>                          | AS 19                                                                                                                                                                                                                                                                                                                                                                          |
| <b>Sex</b>                                 | M                                                                                                                                                                                                                                                                                                                                                                              |
| <b>Study group</b>                         | re-tx                                                                                                                                                                                                                                                                                                                                                                          |
| <b>Time (months)*</b>                      | 114                                                                                                                                                                                                                                                                                                                                                                            |
| <b>Self HLA class I</b>                    | A*01:01:01:01, A*26:01:01:01, B*15:01:01:01, B*38:01:01, C*03:03:01:01, C*12:03:01:01                                                                                                                                                                                                                                                                                          |
| <b>Self HLA class II</b>                   | DRB1*13:02:01, DRB1*15:01:01, DRB3*03:01:01, DRB5*01:01:01, DQB1*06:02:01:01, DQB1*06:09:01:01, DQA1*01:02:01, DPB1*04:01:01, DPA1*01:03:01:04                                                                                                                                                                                                                                 |
| <b>Donor (D)/Partner (P)/Child (C) HLA</b> | <b>D:</b> A1, <b>A11</b> , <b>B8</b> , B62, Cw3, <b>DR3</b> , DR15, DQ1, <b>DQ2</b>                                                                                                                                                                                                                                                                                            |
| <b>Serum positive class I SABs</b>         | not available                                                                                                                                                                                                                                                                                                                                                                  |
| <b>Supernatant positive class I SABs</b>   | negative                                                                                                                                                                                                                                                                                                                                                                       |
| <b>Serum positive class II SABs</b>        | not available                                                                                                                                                                                                                                                                                                                                                                  |
| <b>Supernatant positive class II SABs</b>  | DQA1*05:01-DQB1*02:01, DQA1*03:02-DQB1*02:02, DQA1*05:01-DQB1*02:02, DQA1*03:01-DQB1*03:01, DQA1*03:02-DQB1*03:01, DQA1*05:01-DQB1*03:01, DQA1*06:01-DQB1*03:01, DQA1*03:01-DQB1*03:02, DQA1*03:02-DQB1*03:02, DQA1*03:02-DQB1*03:03, DQA1*04:01-DQB1*03:03, DQA1*06:01-DQB1*03:03, DQA1*04:01-DQB1*04:01, DQA1*05:01-DQB1*04:01, DQA1*04:01-DQB1*04:02, DQA1*06:01-DQB1*04:02 |

Table S1 continued

|                                            |                                                                                                                                                                                                                                                                                                                                                                                                                                                                          |
|--------------------------------------------|--------------------------------------------------------------------------------------------------------------------------------------------------------------------------------------------------------------------------------------------------------------------------------------------------------------------------------------------------------------------------------------------------------------------------------------------------------------------------|
| <b>Study code</b>                          | AS 20                                                                                                                                                                                                                                                                                                                                                                                                                                                                    |
| <b>Sex</b>                                 | F                                                                                                                                                                                                                                                                                                                                                                                                                                                                        |
| <b>Study group</b>                         | re-tx                                                                                                                                                                                                                                                                                                                                                                                                                                                                    |
| <b>Time (months)*</b>                      | 74                                                                                                                                                                                                                                                                                                                                                                                                                                                                       |
| <b>Self HLA class I</b>                    | A*23:01:01:01, A*31:01:02:01, B*40:01:02, B*50:02, C*03:04:01:01, C*06:02:01:02                                                                                                                                                                                                                                                                                                                                                                                          |
| <b>Self HLA class II</b>                   | DRB1*04:04:01, DRB1*04:06:02, DRB4*01:03:01:01, DQB1*03:02:01, DQB1*04:02:01, DQA1*03:01:01, DQA1*03:03:01:01, DPB1*03:01/124:01, DPB1*04:01/350:01, DPA1*01:03:01:02, DPA1*01:03:01:03                                                                                                                                                                                                                                                                                  |
| <b>Donor (D)/Partner (P)/Child (C) HLA</b> | <b>D: A1, A24, B8, B60, Cw3, Cw7, DR1, DR4, DQ1, DQ3</b>                                                                                                                                                                                                                                                                                                                                                                                                                 |
| <b>Serum positive class I SABs</b>         | A*01:01, B*08:01, B*35:01, B*35:08, B*37:01, B*42:01, B*51:01, B*53:01, B*59:01                                                                                                                                                                                                                                                                                                                                                                                          |
| <b>Supernatant positive class I SABs</b>   | negative                                                                                                                                                                                                                                                                                                                                                                                                                                                                 |
| <b>Serum positive class II SABs</b>        | DRB1*01:01, DRB1*01:02, DRB1*01:03, DRB1*04:02, DRB1*08:01, DRB1*08:02, DRB1*11:01, DRB1*11:03, DRB1*11:04, DRB1*12:01, DRB1*12:02, DRB1*13:01, DRB1*13:03, DRB1*13:05, DRB1*14:03, DRB1*16:01, DRB1*16:02, DRB5*01:01, DRB5*02:02, DQA1*01:01-DQB1*05:01, DQA1*01:02-DQB1*05:01, DQA1*01:02-DQB1*05:02, DQA1*01:04-DQB1*05:03, DQA1*01:03-DQB1*06:01, DQA1*01:04-DQB1*06:01, DQA1*02:01-DQB1*06:01, DQA1*01:02-DQB1*06:02, DQA1*01:03-DQB1*06:03, DQA1*01:02-DQB1*06:04 |
| <b>Supernatant positive class II SABs</b>  | DQA1*01:01-DQB1*05:01, DQA1*01:02-DQB1*05:01, DQA1*01:02-DQB1*05:02, DQA1*01:04-DQB1*05:03, DQA1*01:03-DQB1*06:01, DQA1*01:04-DQB1*06:01, DQA1*02:01-DQB1*06:01, DQA1*01:02-DQB1*06:02, DQA1*01:03-DQB1*06:03, DQA1*01:02-DQB1*06:04                                                                                                                                                                                                                                     |

Table S1 continued

|                                            |                                                                                                                                                                                                                                      |
|--------------------------------------------|--------------------------------------------------------------------------------------------------------------------------------------------------------------------------------------------------------------------------------------|
| <b>Study code</b>                          | AS 21                                                                                                                                                                                                                                |
| <b>Sex</b>                                 | F                                                                                                                                                                                                                                    |
| <b>Study group</b>                         | re-tx                                                                                                                                                                                                                                |
| <b>Time (months)*</b>                      | 72                                                                                                                                                                                                                                   |
| <b>Self HLA class I</b>                    | A*02:01:01, A*29:02:01:01, B*44:03:01, B*73:01, C*15:05:01, C*16:01:01:01                                                                                                                                                            |
| <b>Self HLA class II</b>                   | DRB1*04:05:01, DRB1*13:02:01, DRB3*03:01:01, DRB4*01:03:01:01, DQB1*02:02:01:02, DQB1*06:04:01, DQA1*01:02:01, DQA1*03:03:01:01, DPB1*02:01:02, DPB1*13:01/107:01, DPA1*01:03:01:01, DPA1*02:01:01:01                                |
| <b>Donor (D)/Partner (P)/Child (C) HLA</b> | <b>D1:</b> unknown<br><b>D2:</b> A2, B44, <b>B50</b> , DR4, DR13, <b>DQ7</b><br><b>D3:</b> A2, B44, DR4, DR13, DQ1, <b>DQ3</b>                                                                                                       |
| <b>Serum positive class I SABs</b>         | negative                                                                                                                                                                                                                             |
| <b>Supernatant positive class I SABs</b>   | negative                                                                                                                                                                                                                             |
| <b>Serum positive class II SABs</b>        | DQA1*03:01-DQB1*03:01, DQA1*03:02-DQB1*03:01, DQA1*05:01-DQB1*03:01, DQA1*06:01-DQB1*03:01, DQA1*02:01-DQB1*03:02, DQA1*03:01-DQB1*03:02, DQA1*03:02-DQB1*03:02, DQA1*03:02-DQB1*03:03, DQA1*04:01-DQB1*03:03, DQA1*06:01-DQB1*03:03 |
| <b>Supernatant positive class II SABs</b>  | DQA1*02:01-DQB1*03:02, DQA1*03:01-DQB1*03:02, DQA1*03:02-DQB1*03:02, DQA1*03:02-DQB1*03:03, DQA1*04:01-DQB1*03:03                                                                                                                    |

Table S1 continued

|                                            |                                                                                                                                                                                                                                                                                                                                                                                                                                                                                                                          |
|--------------------------------------------|--------------------------------------------------------------------------------------------------------------------------------------------------------------------------------------------------------------------------------------------------------------------------------------------------------------------------------------------------------------------------------------------------------------------------------------------------------------------------------------------------------------------------|
| <b>Study code</b>                          | AS 22                                                                                                                                                                                                                                                                                                                                                                                                                                                                                                                    |
| <b>Sex</b>                                 | M                                                                                                                                                                                                                                                                                                                                                                                                                                                                                                                        |
| <b>Study group</b>                         | re-tx                                                                                                                                                                                                                                                                                                                                                                                                                                                                                                                    |
| <b>Time (months)*</b>                      | 132                                                                                                                                                                                                                                                                                                                                                                                                                                                                                                                      |
| <b>Self HLA class I</b>                    | A*01:01:01:01, A*02:01:01, B*08:01:01:01, B*15:01:01:01, C*03:04:01:01, C*07:01:01:01                                                                                                                                                                                                                                                                                                                                                                                                                                    |
| <b>Self HLA class II</b>                   | DRB1*03:01:01, DRB1*04:01:01:02, DRB3*01:01:02, DRB4*01:03:01:01, DQB1*02:01:01, DQB1*03:02:01, DQA1*03:01:01, DQA1*05:01:01:02, DPB1*04:01:01, DPA1*01:03:01:02, DPA1*01:03:01:04                                                                                                                                                                                                                                                                                                                                       |
| <b>Donor (D)/Partner (P)/Child (C) HLA</b> | D: A2, A11, B8, B62, DR17, DR4, DQ2, DQ8                                                                                                                                                                                                                                                                                                                                                                                                                                                                                 |
| <b>Serum positive class I SABs</b>         | negative                                                                                                                                                                                                                                                                                                                                                                                                                                                                                                                 |
| <b>Supernatant positive class I SABs</b>   | negative                                                                                                                                                                                                                                                                                                                                                                                                                                                                                                                 |
| <b>Serum positive class II SABs</b>        | DPA1*01:03-DPB1*01:01, DPA1*02:01-DPB1*01:01, DPA1*02:02-DPB1*01:01, DPA1*03:01-DPB1*01:01, DPA1*01:03-DPB1*03:01, DPA1*02:01-DPB1*04:01, DPA1*02:02-DPB1*04:01, DPA1*04:01-DPB1*04:01, DPA1*02:01-DPB1*05:01, DPA1*02:02-DPB1*05:01, DPA1*03:01-DPB1*05:01, DPA1*01:03-DPB1*06:01, DPA1*02:01-DPB1*09:01, DPA1*02:01-DPB1*11:01, DPA1*02:01-DPB1*13:01, DPA1*04:01-DPB1*13:01, DPA1*02:01-DPB1*14:01, DPA1*02:01-DPB1*15:01, DPA1*02:01-DPB1*17:01, DPA1*01:03-DPB1*18:01, DPA1*02:01-DPB1*19:01, DPA1*02:02-DPB1*28:01 |
| <b>Supernatant positive class II SABs</b>  | DPA1*01:03-DPB1*01:01, DPA1*02:01-DPB1*01:01, DPA1*02:02-DPB1*01:01, DPA1*03:01-DPB1*01:01, DPA1*01:03-DPB1*03:01, DPA1*02:01-DPB1*04:01, DPA1*02:02-DPB1*04:01, DPA1*04:01-DPB1*04:01, DPA1*02:01-DPB1*05:01, DPA1*02:02-DPB1*05:01, DPA1*03:01-DPB1*05:01, DPA1*01:03-DPB1*06:01, DPA1*02:01-DPB1*09:01, DPA1*02:01-DPB1*11:01, DPA1*02:01-DPB1*13:01, DPA1*04:01-DPB1*13:01, DPA1*02:01-DPB1*14:01, DPA1*02:01-DPB1*15:01, DPA1*02:01-DPB1*17:01, DPA1*01:03-DPB1*18:01, DPA1*02:01-DPB1*19:01, DPA1*02:02-DPB1*28:01 |

Table S1 continued

|                                            |                                                                                                                                                                                                                                                                                                                        |
|--------------------------------------------|------------------------------------------------------------------------------------------------------------------------------------------------------------------------------------------------------------------------------------------------------------------------------------------------------------------------|
| <b>Study code</b>                          | AS 23                                                                                                                                                                                                                                                                                                                  |
| <b>Sex</b>                                 | F                                                                                                                                                                                                                                                                                                                      |
| <b>Study group</b>                         | re-tx                                                                                                                                                                                                                                                                                                                  |
| <b>Time (months)*</b>                      | 2                                                                                                                                                                                                                                                                                                                      |
| <b>Self HLA class I</b>                    | A*01:01:01:01, A*02:01:01, B*08:01:01:01, B*40:01:02, C*03:04:01:01, C*07:01:01:01                                                                                                                                                                                                                                     |
| <b>Self HLA class II</b>                   | DRB1*03:01:01, DRB1*13:02:01, DRB3*01:01:02, DRB3*03:01:01, DQB1*02:01:01, DQB1*06:04:01, DQA1*01:02:01, DQA1*05:01:01:02, DPB1*03:01/124:01, DPB1*04:01/350:01, DPA1*01:03:01:02, DPA1*01:03:01:03                                                                                                                    |
| <b>Donor (D)/Partner (P)/Child (C) HLA</b> | D1: A1, A2, B8, B15<br>D2: A1, <b>A24</b> , B8, <b>B41</b> , Cw7, DR3, DR13, DQ2, <b>DQ7</b>                                                                                                                                                                                                                           |
| <b>Serum positive class I SABs</b>         | negative                                                                                                                                                                                                                                                                                                               |
| <b>Supernatant positive class I SABs</b>   | negative                                                                                                                                                                                                                                                                                                               |
| <b>Serum positive class II SABs</b>        | DRB1*04:04, DRB1*04:05, DRB4*01:01, DQA1*03:02-DQB1*02:02, DQA1*03:01-DQB1*03:01, DQA1*03:02-DQB1*03:01, DQA1*05:01-DQB1*03:01, DQA1*06:01-DQB1*03:01, DQA1*02:01-DQB1*03:02, DQA1*03:01-DQB1*03:02, DQA1*03:02-DQB1*03:02, DQA1*03:02-DQB1*03:03, DQA1*04:01-DQB1*03:03, DQA1*06:01-DQB1*03:03, DQA1*03:01-DQB1*04:02 |
| <b>Supernatant positive class II SABs</b>  | negative                                                                                                                                                                                                                                                                                                               |

Table S1 continued

|                                            |                                                                                                                                                                                                                                                                                                                                                                                                                              |
|--------------------------------------------|------------------------------------------------------------------------------------------------------------------------------------------------------------------------------------------------------------------------------------------------------------------------------------------------------------------------------------------------------------------------------------------------------------------------------|
| <b>Study code</b>                          | AS 24                                                                                                                                                                                                                                                                                                                                                                                                                        |
| <b>Sex</b>                                 | F                                                                                                                                                                                                                                                                                                                                                                                                                            |
| <b>Study group</b>                         | re-tx                                                                                                                                                                                                                                                                                                                                                                                                                        |
| <b>Time (months)*</b>                      | 3                                                                                                                                                                                                                                                                                                                                                                                                                            |
| <b>Self HLA class I</b>                    | A*02:01:01, B*08:01:01:01, B*18:01:01, C*07:01:01:01, C*12:03:01:01                                                                                                                                                                                                                                                                                                                                                          |
| <b>Self HLA class II</b>                   | DRB1*15:01:01, DRB5*01:01:01, DQB1*06:02:01:01, DQA1*01:02:01, DPB1*01:01:01, DPB1*13:01/107:01, DPA1*02:01:01:01, DPA1*02:02:02                                                                                                                                                                                                                                                                                             |
| <b>Donor (D)/Partner (P)/Child (C) HLA</b> | <b>D: A1, A2, B18, B57, Cw6, Cw12, DR13, DR15, DR51, DR52, DQ3, DQ6</b>                                                                                                                                                                                                                                                                                                                                                      |
| <b>Serum positive class I SABs</b>         | not available                                                                                                                                                                                                                                                                                                                                                                                                                |
| <b>Supernatant positive class I SABs</b>   | A*01:01, A*11:01, A*11:02, A*23:01, A*24:02, A*25:01, A*26:01, A*30:01, A*32:01, A*34:02, A*36:01, A*66:01, A*66:02, B*15:12, B*15:13, B*15:16, B*44:02, B*44:03, B*45:01, B*57:01, B*58:01                                                                                                                                                                                                                                  |
| <b>Serum positive class II SABs</b>        | not available                                                                                                                                                                                                                                                                                                                                                                                                                |
| <b>Supernatant positive class II SABs</b>  | DQA1*05:01-DQB1*02:01, DQA1*03:02-DQB1*02:02, DQA1*05:01-DQB1*02:02, DQA1*03:01-DQB1*03:01, DQA1*03:02-DQB1*03:01, DQA1*05:01-DQB1*03:01, DQA1*06:01-DQB1*03:01, DQA1*02:01-DQB1*03:02, DQA1*03:01-DQB1*03:02, DQA1*03:02-DQB1*03:02, DQA1*03:02-DQB1*03:03, DQA1*04:01-DQB1*03:03, DQA1*06:01-DQB1*03:03, DQA1*04:01-DQB1*04:01, DQA1*05:01-DQB1*04:01, DQA1*03:01-DQB1*04:02, DQA1*04:01-DQB1*04:02, DQA1*06:01-DQB1*04:02 |

Table S1 continued

|                                            |                                                                                                                                                                                                                                                                                                                                                                                  |
|--------------------------------------------|----------------------------------------------------------------------------------------------------------------------------------------------------------------------------------------------------------------------------------------------------------------------------------------------------------------------------------------------------------------------------------|
| <b>Study code</b>                          | AS 25                                                                                                                                                                                                                                                                                                                                                                            |
| <b>Sex</b>                                 | F                                                                                                                                                                                                                                                                                                                                                                                |
| <b>Study group</b>                         | re-tx                                                                                                                                                                                                                                                                                                                                                                            |
| <b>Time (months)*</b>                      | 121                                                                                                                                                                                                                                                                                                                                                                              |
| <b>Self HLA class I</b>                    | A*01:01:01:01, B*37:01:01, B*57:01:01, C*06:02:01:01                                                                                                                                                                                                                                                                                                                             |
| <b>Self HLA class II</b>                   | DRB1*04:02:01, DRB1*07:01:01, DRB4*01:03:01:01, DRB4*01:03:01:02N, DQB1*03:02:01, DQB1*03:03:02:01, DQA1*02:01:01, DQA1*03:01:01, DPB1*04:01:01, DPB1*13:01/107:01, DPA1*01:03:01:04, DPA1*02:01:01:01                                                                                                                                                                           |
| <b>Donor (D)/Partner (P)/Child (C) HLA</b> | <b>D:</b> A1, <b>A32</b> , B17, <b>B40</b> , <b>Cw3</b> , Cw6, <b>DR3</b> , DR7, <b>DQ2</b>                                                                                                                                                                                                                                                                                      |
| <b>Serum positive class I SABs</b>         | A*02:01, A*02:02, A*02:03, A*02:05, A*11:02, A*68:01, A*68:02, B*13:02, B*40:01, B*82:02                                                                                                                                                                                                                                                                                         |
| <b>Supernatant positive class I SABs</b>   | negative                                                                                                                                                                                                                                                                                                                                                                         |
| <b>Serum positive class II SABs</b>        | DRB1*03:01, DRB1*03:02, DRB1*03:03, DRB3*01:01, DQA1*02:01-DQB1*02:01, DQA1*05:01-DQB1*02:01, DQA1*02:01-DQB1*02:02, DQA1*03:02-DQB1*02:02, DQA1*05:01-DQB1*02:02, DQA1*05:01-DQB1*03:01, DQA1*06:01-DQB1*03:01, DQA1*04:01-DQB1*03:03, DQA1*06:01-DQB1*03:03, DQA1*04:01-DQB1*04:01, DQA1*05:01-DQB1*04:01, DQA1*04:01-DQB1*04:02, DQA1*06:01-DQB1*04:02, DQA1*01:02-DQB1*05:02 |
| <b>Supernatant positive class II SABs</b>  | DRB1*03:01, DRB1*03:02, DRB1*03:03, DRB3*01:01, DQA1*05:01-DQB1*02:01, DQA1*05:01-DQB1*02:02, DQA1*05:01-DQB1*03:01, DQA1*04:01-DQB1*03:03, DQA1*06:01-DQB1*03:03, DQA1*04:01-DQB1*04:01, DQA1*05:01-DQB1*04:01, DQA1*04:01-DQB1*04:02, DQA1*06:01-DQB1*04:02                                                                                                                    |



Table S1 continued

|                                                |                                                                                                                                                                                                                                                                                                                                                                                   |
|------------------------------------------------|-----------------------------------------------------------------------------------------------------------------------------------------------------------------------------------------------------------------------------------------------------------------------------------------------------------------------------------------------------------------------------------|
| <b>Study code</b>                              | AS 26                                                                                                                                                                                                                                                                                                                                                                             |
| <b>Sex</b>                                     | F                                                                                                                                                                                                                                                                                                                                                                                 |
| <b>Study group</b>                             | re-tx                                                                                                                                                                                                                                                                                                                                                                             |
| <b>Time (months)*</b>                          | 56                                                                                                                                                                                                                                                                                                                                                                                |
| <b>Self HLA class I</b>                        | A*11:01:01:01, A*29:02:01:01, B*18:01:01,<br>B*50:01:01:02, C*04:01:01:01, C*05:01:01:01                                                                                                                                                                                                                                                                                          |
| <b>Self HLA class II</b>                       | DRB1*03:01:01, DRB1*10:01:01, DRB3*02:02:01:01,<br>DQB1*02:01:01, DQB1*05:01:01,<br>DQA1*01:05:01, DQA1*05:01:01:01,<br>DPB1*04:02:01:02, DPB1*30:01, DPA1*01:03:01:02,<br>DPA1*02:01:01:01                                                                                                                                                                                       |
| <b>Donor (D)/Partner (P)/Child (C)<br/>HLA</b> | <b>D: A1, A33, B18, B50, Cw5, Cw6, DR17, DR7, DR53,<br/>DQ2</b>                                                                                                                                                                                                                                                                                                                   |
| <b>Serum positive class I SABs</b>             | A*01:01, A*23:01, A*24:02, A*36:01, A*80:01, B*15:12,<br>B*44:02, B*44:03, B*45:01, B*82:02                                                                                                                                                                                                                                                                                       |
| <b>Supernatant positive class I<br/>SABs</b>   | A*01:01, A*24:02, A*36:01, <b>A*66:02</b>                                                                                                                                                                                                                                                                                                                                         |
| <b>Serum positive class II SABs</b>            | DRB1*04:02, DRB1*07:01, DRB1*08:02, DRB1*09:01,<br>DRB1*11:04, DRB1*12:01, DRB1*13:03, DRB1*14:03,<br>DRB1*16:02, DRB4*01:01, DQA1*02:01-DQB1*02:01,<br>DQA1*02:01-DQB1*02:02, DQA1*03:01-DQB1*03:01,<br>DQA1*03:02-DQB1*03:01, DQA1*06:01-DQB1*03:01,<br>DQA1*02:01-DQB1*03:02, DQA1*03:02-DQB1*03:03,<br>DQA1*02:01-DQB1*04:01, DQA1*03:01-DQB1*04:02,<br>DQA1*02:01-DQB1*06:01 |
| <b>Supernatant positive class II<br/>SABs</b>  | DRB1*07:01, DRB4*01:01, DQA1*02:01-DQB1*03:02,<br>DQA1*03:02-DQB1*03:03                                                                                                                                                                                                                                                                                                           |
